# Supplementary material for: Transcriptomic Analysis of Green Leaf Plants and White–Green Leaf Mutants in Haworthia cooperi var. pilifera
Source: MDPI journal article supplement (doi:10.3390/genes15050608), 2024-05-10
Supplement: s1 [file s1]

Table S1 Statistics of de novo assembly

|          | Total  | Total      | length | Mean  | length | Longest unigene | Shortest unigene | N50 (bp) |
|----------|--------|------------|--------|-------|--------|-----------------|------------------|----------|
|          | number | (bp)       |        | (bp)  |        | (bp)            | (bp)             |          |
| Unigenes | 84,163 | 85,259,353 |        | 1,013 |        | 15,563          | 200              | 1,668    |
