# Supplementary material for: Transcriptomic Analysis of Green Leaf Plants and White–Green Leaf Mutants in Haworthia cooperi var. pilifera
Source: MDPI journal article supplement (doi:10.3390/genes15050608), 2024-05-10
Supplement: s1 [file s1]

Table S4 KEGG annotation of DEGs (P value $\leq$  0.01)

| Pathway                                               | Number | P value     | Q value  | Pathway ID |
|-------------------------------------------------------|--------|-------------|----------|------------|
| Metabolic pathways                                    | 420    | 7.14E-07    | 1.83E-05 | ko01100    |
| Plant-pathogen interaction                            | 149    | 6.31E-22    | 6.88E-20 | ko04626    |
| Glycerophospholipid metabolism                        | 127    | 1.21E-05    | 1.38E-04 | ko00564    |
| Endocytosis                                           | 125    | 4.50E-05    | 3.77E-04 | ko04144    |
| Plant hormone signal transduction                     | 124    | 2.00E-15    | 1.09E-13 | ko04075    |
| Ether lipid metabolism                                | 117    | 1.89E-06    | 3.43E-05 | ko00565    |
| Starch and sucrose metabolism                         | 68     | 0.000651595 | 4.18E-03 | ko00500    |
| Pentose and glucuronate interconversions              | 46     | 0.000109492 | 7.96E-04 | ko00040    |
| Phenylpropanoid biosynthesis                          | 28     | 0.003058983 | 1.52E-02 | ko00940    |
| Stilbenoid, diarylheptanoid and gingerol biosynthesis | 27     | 1.26E-05    | 1.38E-04 | ko00945    |
| Carotenoid biosynthesis                               | 23     | 1.84E-05    | 1.82E-04 | ko00906    |
| Galactose metabolism                                  | 23     | 0.00010578  | 7.96E-04 | ko00052    |
| Nitrogen metabolism                                   | 22     | 4.95E-08    | 1.80E-06 | ko00910    |
| Other glycan degradation                              | 22     | 8.35E-06    | 1.14E-04 | ko00511    |
| Flavone and flavonol biosynthesis                     | 17     | 8.39E-07    | 1.83E-05 | ko00944    |
| Ascorbate and aldarate metabolism                     | 17     | 0.000296948 | 2.02E-03 | ko00053    |
| Flavonoid biosynthesis                                | 17     | 0.001840759 | 1.00E-02 | ko00941    |
| Limonene and pinene degradation                       | 16     | 0.006129359 | 2.90E-02 | ko00903    |
| Glycosphingolipid biosynthesis - ganglio series       | 13     | 3.98E-06    | 6.20E-05 | ko00604    |
| Diterpenoid biosynthesis                              | 13     | 4.43E-05    | 3.77E-04 | ko00904    |

|                                         |    |             |          |         |
|-----------------------------------------|----|-------------|----------|---------|
| Glycosaminoglycan degradation           | 13 | 0.000845821 | 5.12E-03 | ko00531 |
| Sphingolipid metabolism                 | 13 | 0.001178432 | 6.76E-03 | ko00600 |
| Biosynthesis of unsaturated fatty acids | 11 | 0.009055237 | 4.11E-02 | ko01040 |
| Linoleic acid metabolism                | 8  | 0.002638935 | 1.37E-02 | ko00591 |

---
