# Supplementary material for: Transcriptomic Analysis of Green Leaf Plants and White–Green Leaf Mutants in Haworthia cooperi var. pilifera
Source: MDPI journal article supplement (doi:10.3390/genes15050608), 2024-05-10
Supplement: s1 [file s1]

**Table S2** Annotation of unigenes with different public database

| Database                | Number of unigenes | Percentage (%) |
|-------------------------|--------------------|----------------|
| Annotated in NR         | 48,085             | 57.13          |
| Annotated in NT         | 36,210             | 43.02          |
| Annotated in Swiss-Prot | 33,036             | 39.25          |
| Annotated in KEGG       | 30,353             | 36.06          |
| Annotated in COG        | 20,941             | 24.88          |
| Annotated in GO         | 33,527             | 39.84          |
| Total unigenes          | 84,163             | 100            |
