# Supplementary material for: Transcriptomic Analysis of Green Leaf Plants and White–Green Leaf Mutants in Haworthia cooperi var. pilifera
Source: MDPI journal article supplement (doi:10.3390/genes15050608), 2024-05-10
Supplement: s1 [file s1]

**Table S3** DEGs of the two groups

| Compare | Up  | Down  | All   |
|---------|-----|-------|-------|
| LV, HUA | 590 | 1,996 | 2,586 |
