# Supplementary material for: Transcriptomic Analysis of Green Leaf Plants and White–Green Leaf Mutants in Haworthia cooperi var. pilifera
Source: MDPI journal article supplement (doi:10.3390/genes15050608), 2024-05-10
Supplement: s1 [file s1]

Table S5 The differentially expressed genes related to plant pigment in leaf color mutant compared to control plant of *Haworthia cooperi* var. *pilifera*

| Function                      | Gene ID             | log2 Ratio  | up-down regulation | P value    | FRD       | Gene description                        |
|-------------------------------|---------------------|-------------|--------------------|------------|-----------|-----------------------------------------|
| Chloroplast<br>vision         | Unigene5427_All     | -2.40870008 | down               | 9.13E-07   | 0.000142  | tubulin $\beta$ -7 chain                |
|                               | CL2099.Contig19_All | -2.16526084 | down               | 1.22E-06   | 0.0001814 | tubulin $\beta$ -1 chain-like isoform 1 |
|                               | CL2099.Contig8_All  | -1.8927825  | down               | 1.36E-05   | 0.0013319 | Tubulin $\beta$ -8 chain                |
|                               | CL2099.Contig6_All  | -1.56773889 | down               | 0.00016369 | 0.0094047 | Tubulin $\beta$ -4 chain                |
|                               | Unigene8230_All     | -1.77373168 | down               | 0.0005282  | 0.0224964 | $\beta$ -tubulin 2                      |
|                               | CL2099.Contig4_All  | -2.18043304 | down               | 0.00053477 | 0.0226687 | tubulin $\beta$ -1 chain-like isoform 1 |
|                               | Unigene1981_All     | 2.018348859 | up                 | 1.45E-05   | 0.0014003 | $\alpha$ -tubulin suppressor            |
| Plant<br>pigment<br>synthesis | CL11028.Contig1_All | -3.10557453 | down               | 1.63E-12   | 1.84E-09  | magnesium chelatase                     |

|                     |             |      |            |           |                                            |
|---------------------|-------------|------|------------|-----------|--------------------------------------------|
| CL5604.Contig1_All  | -1.43372097 | down | 0.00095443 | 0.0348351 | Probable chlorophyll(ide) b reductase NYC1 |
| CL4410.Contig5_All  | 2.092666247 | up   | 2.18E-07   | 4.31E-05  | ζ-carotene desaturase                      |
| Unigene17993_All    | 1.317418677 | up   | 0.00108391 | 0.0382206 | ζ-carotene isomerase                       |
| CL4410.Contig4_All  | 1.390519217 | up   | 0.00124997 | 0.042713  | ζ-carotene desaturase                      |
| CL1839.Contig3_All  | -1.50627327 | down | 0.000356   | 0.0168495 | ζ-carotene desaturase                      |
| Unigene7511_All     | -1.75886672 | down | 0.00042667 | 0.0192425 | ζ-carotene desaturase                      |
| CL1839.Contig5_All  | -1.57263871 | down | 0.00059144 | 0.0244243 | ζ-carotene desaturase                      |
| Unigene7508_All     | -1.78283725 | down | 0.00080739 | 0.0309188 | ζ-carotene desaturase                      |
| CL504.Contig5_All   | -2.46716559 | down | 3.43E-08   | 8.71E-06  | Zeaxanthin epoxidase                       |
| Unigene11027_All    | 1.314412055 | up   | 0.00107066 | 0.0379558 | Zeaxanthin epoxidase                       |
| CL504.Contig2_All   | -1.80965596 | down | 0.00115262 | 0.040083  | Zeaxanthin epoxidase                       |
| Unigene4973_All     | 1.438920132 | up   | 0.00034926 | 0.0166441 | 15-cis-ζ-carotene isomerase                |
| CL13577.Contig7_All | -2.48171492 | down | 8.58E-09   | 2.62E-06  | Predicted naringenin-chalcone synthase     |

|                     |              |      |             |             |                                        |
|---------------------|--------------|------|-------------|-------------|----------------------------------------|
| CL13577.Contig3_All | -2.24188456  | down | 6.09E-05    | 0.0043906   | Predicted naringenin-chalcone synthase |
| Unigene26705_All    | -10.1949701  | down | 8.78E-05    | 0.005766    | Predicted naringenin-chalcone synthase |
| Unigene26706_All    | -1.61556237  | down | 0.00013207  | 0.0079331   | Predicted naringenin-chalcone synthase |
| CL13577.Contig4_All | -2.20983127  | down | 0.00022635  | 0.0119495   | Predicted naringenin-chalcone synthase |
| CL3495.Contig2_All  | -3.048023982 | down | 3.95E-12    | 3.97E-09    | flavonoid 3'-monooxygenase-like        |
| Unigene632_All      | -2.090751384 | down | 8.16E-06    | 0.000891337 | flavonoid 3'-monooxygenase             |
| Unigene20726_All    | -10.15789874 | down | 1.21E-05    | 0.001215875 | flavonoid 3'-monooxygenase             |
| CL3495.Contig1_All  | -3.530357842 | down | 0.000222926 | 0.011821191 | flavonoid 3'-monooxygenase             |
| CL6831.Contig1_All  | -14.7153015  | down | 2.18E-09    | 8.42E-07    | cytochrome P450                        |
| Unigene11481_All    | -2.56523642  | down | 3.00E-09    | 1.11E-06    | cytochrome P450 81D1-like              |
| Unigene20404_All    | -2.81708382  | down | 5.09E-06    | 0.0006094   | Cytochrome P450 90D2                   |
| CL2201.Contig3_All  | -1.8829742   | down | 7.49E-06    | 0.0008337   | Cytochrome P450                        |
| Unigene17451_All    | -4.50826667  | down | 9.91E-06    | 0.0010404   | Cytochrome P450 94A1                   |

|                     |             |      |            |           |                                             |
|---------------------|-------------|------|------------|-----------|---------------------------------------------|
| CL1249.Contig6_All  | 3.187361737 | up   | 0.00024554 | 0.012758  | Cytochrome P450                             |
| CL4347.Contig1_All  | -1.73764874 | down | 0.00030511 | 0.0150143 | cytochrome P450 71B34-like                  |
| Unigene27172_All    | 1.487081466 | up   | 0.00054274 | 0.02289   | Cytochrome P450 71D8                        |
| Unigene42234_All    | -5.01983932 | down | 0.00060952 | 0.0249725 | cytochrome P450 94A1-like                   |
| Unigene11038_All    | -1.32405972 | down | 0.00082282 | 0.0312796 | cytochrome P450 allene oxide synthase       |
| CL2201.Contig6_All  | -1.67860822 | down | 0.00094467 | 0.0346156 | cytochrome P450                             |
| Unigene4806_All     | -3.3313211  | down | 0.0010471  | 0.0372697 | Cytochrome P450 71A4                        |
| CL13369.Contig2_All | -1.59649585 | down | 0.00104818 | 0.0372924 | cytochrome P450 81D1-like                   |
| CL4347.Contig2_All  | -1.52984948 | down | 0.00119994 | 0.0413436 | cytochrome P450 71B34-like                  |
| Unigene18224_All    | 5.648674207 | up   | 0.0015035  | 0.0489332 | Cytochrome P450 71A1                        |
| Unigene5170_All     | -1.88410996 | down | 7.69E-05   | 0.0052257 | Chlorophyll a-b binding protein 13          |
| Unigene3942_All     | -1.58495614 | down | 0.00018691 | 0.0104014 | Photosystem II CP43 chlorophyll apoprotein  |
| Unigene4090_All     | -1.93294138 | down | 0.00019497 | 0.0107491 | chloroplast chlorophyll a/b-binding protein |

|                          |                    |             |      |            |           |                                                               |
|--------------------------|--------------------|-------------|------|------------|-----------|---------------------------------------------------------------|
| anthocyanin<br>transport | Unigene4364_All    | -1.37877774 | down | 0.00056958 | 0.0236388 | light-harvesting chlorophyll a/b protein precursor            |
|                          | Unigene3687_All    | -1.37728013 | down | 0.00059884 | 0.0246808 | chloroplast chlorophyll a/b-binding protein                   |
|                          | Unigene4242_All    | -1.42572239 | down | 0.00088158 | 0.0328384 | major chlorophyll a/b binding protein                         |
|                          | CL6060.Contig3_All | -4.3410449  | down | 3.02E-18   | 1.57E-14  | ABC-type Fe <sup>3+</sup> transport system                    |
|                          | Unigene17867_All   | -3.71303095 | down | 2.24E-11   | 1.77E-08  | ABC transporter C family member 10-like                       |
|                          | CL3894.Contig4_All | -4.31091933 | down | 3.18E-09   | 1.16E-06  | ABC transporter C family member 10-like                       |
|                          | CL2478.Contig4_All | -2.50069537 | down | 7.89E-09   | 2.49E-06  | PDR5-like ABC transporter                                     |
|                          | CL2478.Contig3_All | -2.45882435 | down | 1.90E-08   | 5.35E-06  | ABC-type multidrug transport system, ATPase component         |
|                          | Unigene26311_All   | -2.94651659 | down | 8.09E-08   | 1.85E-05  | ABC transporter C family member 10-like                       |
|                          | Unigene22921_All   | -3.58237244 | down | 1.59E-07   | 3.34E-05  | ABC transporter C family member 10                            |
|                          | CL5761.Contig2_All | -3.55635107 | down | 4.11E-07   | 7.42E-05  | ABC transporter C family member 9                             |
|                          | CL5505.Contig4_All | -2.07357126 | down | 1.08E-06   | 0.000163  | ABC-type uncharacterized transport system, permease component |

|                    |             |      |            |           |                                                         |
|--------------------|-------------|------|------------|-----------|---------------------------------------------------------|
| Unigene42386_All   | -4.4267268  | down | 3.18E-06   | 0.0004025 | ABC transporter C family member 10-like                 |
| Unigene21844_All   | -3.3151392  | down | 7.39E-06   | 0.0008253 | ABC transporter C family member 10                      |
| Unigene42160_All   | -13.5786214 | down | 9.42E-06   | 0.0009975 | ABC transporter C family member 10-like                 |
| Unigene10228_All   | -3.55925979 | down | 2.00E-05   | 0.0018041 | ABC transporter C family member 10                      |
| CL2478.Contig2_All | -2.65825216 | down | 0.00010766 | 0.0067644 | ABC-type multidrug transport system, permease component |
| CL5908.Contig1_All | 1.588947592 | up   | 0.00018687 | 0.0104014 | ABC transporter B family member 28                      |
| Unigene14496_All   | 2.922295176 | up   | 0.00024862 | 0.0128643 | ABC-type multidrug transport system, ATPase component   |
| Unigene16742_All   | -1.48192665 | down | 0.00029792 | 0.0148075 | ABC transporter                                         |
| CL8468.Contig4_All | -1.53359781 | down | 0.00032657 | 0.0157887 | ABC transporter D family member 1                       |
| CL8468.Contig6_All | -1.45801597 | down | 0.00050068 | 0.0215638 | ABC transporter D family member 1                       |
| CL1076.Contig2_All | 3.78675128  | up   | 0.0006299  | 0.0256748 | ABC transporter B family member 2                       |
| Unigene14524_All   | -1.46672023 | down | 0.00083655 | 0.0316858 | ABC-type multidrug transport system, ATPase component   |
| CL9731.Contig1_All | 1.705378176 | up   | 0.00146444 | 0.0480754 | ABC transporter B family member 28-like                 |

|                     |              |      |             |             |                                         |
|---------------------|--------------|------|-------------|-------------|-----------------------------------------|
| CL342.Contig2_All   | -5.04436083  | down | 2.78E-12    | 2.93E-09    | MATE efflux family protein 1            |
| CL12515.Contig1_All | -4.72883937  | down | 3.33E-07    | 6.17E-05    | MATE efflux family protein 1            |
| Unigene17547_All    | -1.58658505  | down | 0.00081373  | 0.0310903   | MATE efflux family protein 5            |
| CL4078.Contig1_All  | -1.38969374  | down | 0.0012163   | 0.0418087   | MATE efflux family protein 5            |
| CL4078.Contig2_All  | -4.0306714   | down | 0.00142105  | 0.0469085   | MATE efflux family protein 9            |
| Unigene24280_All    | -3.283938083 | down | 1.85E-09    | 7.46E-07    | glutathione S-transferase               |
| CL9650.Contig1_All  | -2.630148405 | down | 4.11E-08    | 1.02E-05    | glutathione S-transferase               |
| CL1915.Contig1_All  | -4.206256609 | down | 1.65E-07    | 3.42E-05    | glutathione S-transferase               |
| CL1915.Contig2_All  | -4.663436737 | down | 1.52E-06    | 0.000217959 | glutathione S-transferase               |
| Unigene13934_All    | -2.671397556 | down | 8.44E-06    | 0.000916897 | glutathione S-transferase GSTU6         |
| Unigene13933_All    | -1.575520382 | down | 0.000185666 | 0.010365827 | glutathione S-transferase U17 isoform 1 |
| CL9349.Contig1_All  | -1.97080243  | down | 0.000488245 | 0.021159737 | Glutathione S-transferase T3            |
| CL4943.Contig2_All  | -2.45792307  | down | 0.000847201 | 0.032003343 | glutathione S-transferase U17 isoform 1 |

transcription

ctor

|                     |             |      |            |           |                                                          |
|---------------------|-------------|------|------------|-----------|----------------------------------------------------------|
| CL13788.Contig2_All | -3.92006426 | down | 2.78E-16   | 9.26E-13  | Triticum aestivum clone TaMYB18 R2R3-MYB protein mRNA    |
| CL13788.Contig1_All | -4.35646528 | down | 5.59E-12   | 5.23E-09  | Myb superfamily proteins                                 |
| CL12514.Contig2_All | -2.33352498 | down | 3.11E-06   | 0.0003963 | transcription factor MYB39                               |
| Unigene17551_All    | -2.1455495  | down | 3.28E-05   | 0.002674  | MYB-like transcription factor DIVARICATA                 |
| CL9836.Contig2_All  | -2.19520296 | down | 9.24E-05   | 0.0059978 | Myb family transcription factor APL                      |
| CL11604.Contig2_All | -1.70590779 | down | 0.00010222 | 0.006462  | Triticum aestivum clone TaMYB67 MYB-related protein mRNA |
| Unigene28030_All    | -2.68894741 | down | 0.00024107 | 0.0125749 | myb-related transcription factor                         |
| CL7266.Contig1_All  | -2.64234443 | down | 0.00030323 | 0.0149908 | Triticum aestivum clone TaMYB29 R2R3-MYB protein mRNA    |
| CL12936.Contig1_All | 1.305921786 | up   | 0.00094599 | 0.0346486 | myb DNA-binding domain-containing protein                |
| CL13280.Contig2_All | -2.20547801 | down | 2.76E-06   | 0.0003593 | MYB44_ARATH                                              |
| CL7266.Contig2_All  | -2.96274799 | down | 4.87E-05   | 0.0036544 | MYB39_ARATH                                              |
| CL2592.Contig5_All  | -2.01586508 | down | 0.00010491 | 0.0066168 | Myb family transcription factor APL                      |



|                     |             |      |            |           |                                                     |
|---------------------|-------------|------|------------|-----------|-----------------------------------------------------|
| CL2592.Contig3_All  | -1.96619295 | down | 0.00116127 | 0.0403167 | Myb family transcription factor APL                 |
| CL846.Contig8_All   | -2.14107322 | down | 1.32E-06   | 0.0001944 | Vitis vinifera transcription factor bHLH118-like    |
| CL6353.Contig1_All  | -2.50929866 | down | 2.50E-06   | 0.0003322 | Vitis vinifera transcription factor bHLH87-like     |
| CL846.Contig4_All   | -2.38266436 | down | 3.26E-06   | 0.0004094 | putative HLH DNA-binding domain superfamily protein |
| CL846.Contig9_All   | -2.1976101  | down | 7.29E-06   | 0.0008159 | Transcription factor bHLH36                         |
| CL846.Contig2_All   | -2.19806238 | down | 3.80E-05   | 0.0030172 | putative HLH DNA-binding domain superfamily protein |
| CL5677.Contig2_All  | -3.03002896 | down | 0.00015685 | 0.0091191 | transcription factor bHLH92-like                    |
| Unigene7298_All     | -1.64092089 | down | 0.00056431 | 0.0234785 | Vitis vinifera transcription factor bHLH118-like    |
| CL846.Contig5_All   | -1.69272546 | down | 0.00069398 | 0.027777  | Transcription factor bHLH36                         |
| CL3874.Contig2_All  | -1.72550604 | down | 0.00086692 | 0.0324668 | transcription factor bHLH150-like                   |
| Unigene14743_All    | -1.43340106 | down | 0.00140072 | 0.0465154 | Vitis vinifera transcription factor bHLH61-like     |
| CL11133.Contig2_All | -4.34844495 | down | 1.79E-05   | 0.0016366 | WD-40 repeat family protein                         |
| CL11133.Contig1_All | -2.78486288 | down | 2.63E-05   | 0.0022474 | F-box and wd40 domain protein                       |

|                    |             |      |            |           |                             |
|--------------------|-------------|------|------------|-----------|-----------------------------|
| CL4105.Contig1_All | -1.73845394 | down | 3.49E-05   | 0.0028208 | WD-40 repeat family protein |
| CL6688.Contig4_All | 1.41440984  | up   | 0.00117354 | 0.040641  | WD40 repeat                 |
| CL2610.Contig2_All | -1.79096934 | down | 5.36E-05   | 0.003969  | WD40 repeat                 |
| CL3266.Contig5_All | -1.57359253 | down | 0.00039357 | 0.0181729 | WD40 repeat                 |

---
